# Supplementary material for: Pathological findings in organs and tissues of patients with COVID-19: A systematic review
Source: PubMed Central journal article supplement (PMC8081217; doi:10.1371/journal.pone.0250708), 2021-04-28
Supplement: pone.0250708.s004.pdf [file pone.0250708.s004.pdf]

**S2 Table: First author, country, study type, peer review, sample size, gender and age of the included studies**

| Ref. | First Author | Country | Title                                                                                                                                     | Peer reviewed<br>Yes/No | Study type   | Sample size | Specimen source | M, F | Age in years median (range) |
|------|--------------|---------|-------------------------------------------------------------------------------------------------------------------------------------------|-------------------------|--------------|-------------|-----------------|------|-----------------------------|
| 1    | Remmelink M  | Belgium | Unspecific post-mortem findings despite multiorgan viral spread in COVID-19 patients                                                      | Yes                     | Case series  | 17          | Autopsy         | 12,5 | 72 (62-77)                  |
| 2    | Prilutskiy A | USA     | SARS-CoV-2 Infection associated hemophagocytic lymphohistiocytosis: An autopsy series with clinical and laboratory correlation.           | Yes                     | Case series  | 4           | Autopsy         | 3,1  | 72 (64-91)                  |
| 3    | Lax SF       | Austria | Pulmonary arterial thrombosis in COVID-19 with fatal outcome: Results from a prospective, single-center, clinicopathologic case series    | Yes                     | Case series  | 11          | Autopsy         | 8,3  | 81(66-91)                   |
| 4    | De Voeght A  | Belgium | Thrombotic microvascular injury is not mediated by thrombotic microangiopathy despite systemic complement activation in Covid-19 patients | No                      | Case series  | 2           | Autopsy         | NA   | NA                          |
| 5    | Yao XH       | China   | A pathological report of three COVID-19 cases by minimal invasive autopsies                                                               | Yes                     | Case reports | 3           | Autopsy         | 2,1  | 69 (63-79)                  |
| 6    | Liu Q        | China   | Gross examination report of a COVID-19 death autopsy                                                                                      | Yes                     | Case report  | 1           | Autopsy         | 1,0  | 85                          |
| 7    | Su H         | China   | Renal histopathological analysis of 26 postmortem findings of patients with COVID-19 in China                                             | Yes                     | Case series  | 26          | Autopsy         | 19,7 | 69 (39-87)                  |
| 8    | Yang M       | China   | Pathological findings in the testes of COVID-19 patients: Clinical implications                                                           | Yes                     | Case series  | 11          | Autopsy         | 11,0 | 66(42-87)                   |

|    |                |         |                                                                                                                              |     |             |    |         |       |                 |
|----|----------------|---------|------------------------------------------------------------------------------------------------------------------------------|-----|-------------|----|---------|-------|-----------------|
| 9  | Fitzek A       | Germany | Evidence for systematic autopsies in COVID-19 positive deceased: Case report of the first German investigated COVID-19 death | Yes | Case report | 1  | Autopsy | 1,0   | 59              |
| 10 | Wichmann D     | Germany | Autopsy Findings and Venous Thromboembolism in Patients with COVID-19                                                        | Yes | Case series | 12 | Autopsy | 9,3   | 73 (52-87)      |
| 11 | von Weyhern CH | Germany | Early evidence of pronounced brain involvement in fatal COVID-19 outcomes                                                    | Yes | Case series | 6  | Autopsy | 4,2   | 69 (58-82)      |
| 12 | Löffler KU     | Germany | Ocular post-mortem findings in patients having died from COVID-19                                                            | Yes | Case series | 3  | Autopsy | NA    | 88 (67-95)      |
| 13 | Schaller T     | Germany | Postmortem Examination of Patients With COVID-19                                                                             | Yes | Case series | 10 | Autopsy | 7,3   | 79 (64-90)      |
| 14 | Ackermann M    | Germany | Pulmonary Vascular Endothelialitis, Thrombosis, and Angiogenesis in Covid-19                                                 | Yes | Case series | 7  | Autopsy | 5,2   | 78 (66-96)      |
| 15 | Sonzogni A     | Italy   | Liver and COVID 19 infection: a very preliminary lesson learnt from histological post-mortem findings in 48 patients         | No  | Case series | 48 | Autopsy | 35,13 | 71. (32-87)     |
| 16 | Carsana L      | Italy   | Pulmonary post-mortem findings in a series of COVID-19 cases from Northern Italy                                             | Yes | Case series | 38 | Autopsy | 33,5  | Mean 69 (32-86) |
| 17 | Previtali G    | Italy   | The pathogenesis of thromboembolic disease in covid-19 patients: Could be a catastrophic antiphospholipid syndrome?          | Yes | Case series | 35 | Autopsy | 26,9  | 73 (52-82)      |
| 18 | Adachi T       | Japan   | Clinicopathologic and Immunohistochemical Findings from Autopsy of Patient with COVID-19, Japan                              | Yes | Case report | 1  | Autopsy | 0,1   | 84 (84)         |
| 19 | Conde PN       | Spain   | Autopsy findings from the first known death from Severe Acute Respiratory Syndrome SARS-CoV-2 in Spain                       | Yes | Case report | 1  | Autopsy | 1,0   | 69              |
| 20 | Autopsias P    | Spain   | The first COVID-19 autopsy in Spain performed during the early stages of the pandemic                                        | Yes | Case report | 1  | Autopsy | 1,0   | 54              |

|    |              |             |                                                                                                                                                                                                |     |              |    |         |      |                 |
|----|--------------|-------------|------------------------------------------------------------------------------------------------------------------------------------------------------------------------------------------------|-----|--------------|----|---------|------|-----------------|
| 21 | Suess C      | Switzerland | Gross and histopathological pulmonary findings in a COVID-19 associated death during self-isolation                                                                                            | Yes | Case report  | 1  | Autopsy | 1,0  | 59              |
| 22 | Schweitzer W | Switzerland | Implications for forensic death investigations from first Swiss post-mortem CT in a case of non-hospital treatment with COVID-19                                                               | Yes | Case report  | 1  | Autopsy | 1,0  | 50              |
| 23 | Aguiar D     | Switzerland | Inside the lungs of COVID-19 disease                                                                                                                                                           | Yes | Case report  | 1  | Autopsy | 0,1  | 31              |
| 24 | Menter T     | Switzerland | Post-mortem examination of COVID19 patients reveals diffuse alveolar damage with severe capillary congestion and variegated findings of lungs and other organs suggesting vascular dysfunction | Yes | Case series  | 21 | Autopsy | 17,4 | mean 76 (53-96) |
| 25 | Barton LM    | USA         | COVID-19 Autopsies, Oklahoma, USA                                                                                                                                                              | Yes | Case reports | 2  | Autopsy | 2,0  | 60 (42-77)      |
| 26 | Konopka KE   | USA         | Diffuse Alveolar Damage (DAD) from Coronavirus Disease 2019 Infection is Morphologically Indistinguishable from Other Causes of DAD                                                            | Yes | Case series  | 8  | Autopsy | 5,3  | 52 (37-75)      |
| 27 | Bradley BT   | USA         | Histopathology and ultrastructural findings of fatal COVID-19 infections in Washington State: a case series                                                                                    | Yes | Case series  | 14 | Autopsy | 6,8  | 73.5 (42-84)    |
| 28 | Sekulic M    | USA         | Molecular Detection of SARS-CoV-2 Infection in FFPE Samples and Histopathologic Findings in Fatal SARS-CoV-2 Cases                                                                             | Yes | Case reports | 2  | Autopsy | 2,0  | 67.5 (54-81)    |
| 29 | Solomon IH   | USA         | Neuropathological Features of Covid-19                                                                                                                                                         | Yes | Case series  | 18 | Autopsy | 14,4 | 62 (48-90)      |
| 30 | Reichard RR  | USA         | Neuropathology of COVID-19: a spectrum of vascular and acute disseminated encephalomyelitis (ADEM)-like pathology                                                                              | Yes | Case report  | 1  | Autopsy | 1,0  | 71              |

|    |                  |             |                                                                                                                                                                                                   |     |              |    |                             |     |             |
|----|------------------|-------------|---------------------------------------------------------------------------------------------------------------------------------------------------------------------------------------------------|-----|--------------|----|-----------------------------|-----|-------------|
| 31 | Bryce C          | USA         | Pathophysiology of SARS-CoV-2: targeting of endothelial cells renders a complex disease with thrombotic microangiopathy and aberrant immune response. The Mount Sinai COVID-19 autopsy experience | No  | Case series  | 25 | Autopsy                     | NA  | NA          |
| 32 | Konopka KE       | USA         | Postmortem Lung Findings in an Asthmatic Patient with Coronavirus Disease 2019                                                                                                                    | Yes | Case report  | 1  | Autopsy                     | 1,0 | 37          |
| 33 | Fox SE           | USA         | Pulmonary and cardiac pathology in African American patients with COVID-19: an autopsy series from New Orleans                                                                                    | Yes | Case series  | 10 | Autopsy                     | NA  | 64 (44-78)  |
| 34 | Farkash EA       | USA         | Ultrastructural Evidence for Direct Renal Infection with SARS-CoV-2                                                                                                                               | Yes | Case report  | 1  | Autopsy                     | 1,0 | 53          |
| 35 | Paniz-Mondolfi A | USA         | Central nervous system involvement by severe acute respiratory syndrome coronavirus-2 (SARS-CoV-2)                                                                                                | Yes | Case report  | 1  | Autopsy                     | 1,0 | 74          |
| 36 | Craver R         | USA         | Fatal Eosinophilic Myocarditis in a Healthy 17-Year-Old Male with Severe Acute Respiratory Syndrome Coronavirus 2 (SARS-CoV-2)                                                                    | Yes | Case report  | 1  | Autopsy                     | 1,0 | 17          |
| 37 | Yan L            | USA         | Autopsy Report with Clinical Pathological Correlation                                                                                                                                             | Yes | Case report  | 1  | Autopsy                     | 0,1 | 44          |
| 38 | Magro C          | USA         | Complement associated microvascular injury and thrombosis in the pathogenesis of severe COVID-19 infection: A report of five cases                                                                | Yes | Case reports | 5  | Autopsy (2/5),<br>AMB (3/5) | 3,2 | 62 (32- 73) |
| 39 | Varga Z          | Switzerland | Endothelial cell infection and endotheliitis in COVID-19                                                                                                                                          | Yes | Case reports | 3  | Autopsy (2/3),<br>AMB (1/3) | 2,1 | 69 (58-71)  |
| 40 | Mahe A           | France      | Histology of skin lesions establishes that the vesicular rash associated with COVID-19 is not "varicella-like"                                                                                    | Yes | Case series  | 3  | AMB                         | 1,2 | 55 (50-55)  |
| 41 | Escher F         | Germany     | Detection of viral SARS-CoV-2 genomes and histopathological changes in endomyocardial biopsies                                                                                                    | Yes | Case series  | 5  | AMB                         | 4,1 | 48 (36-62)  |

|    |                  |             |                                                                                                                                                                         |     |              |    |          |      |                   |
|----|------------------|-------------|-------------------------------------------------------------------------------------------------------------------------------------------------------------------------|-----|--------------|----|----------|------|-------------------|
| 42 | Rossi GM         | Italy       | Kidney biopsy findings in a critically ill COVID-19 patient with dialysis-dependent acute kidney injury: a case against "SARS-CoV-2 nephropathy"                        | Yes | Case report  | 1  | AMB      | 1,0  | 49                |
| 43 | Llamas-Velasco M | Spain       | Thrombotic occlusive vasculopathy in skin biopsy from a livedoid lesion of a COVID-19 patient                                                                           | Yes | Case report  | 1  | AMB      | 1,0  | 61                |
| 44 | Colmenero I      | Spain       | SARS-CoV-2 endothelial infection causes COVID-19 chilblains: histopathological, immunohistochemical and ultrastructural study of 7 paediatric cases                     | Yes | Case series  | 7  | AMB      | 4,3  | 15 (11-17)        |
| 45 | Reymundo A       | Spain       | Clinical and histological characterization of late appearance maculopapular eruptions in association with the coronavirus disease 2019. A case series of seven patients | Yes | Case series  | 4  | AMB      | 1,3  | 62.5 (57-67)      |
| 46 | Tian S           | China       | Pulmonary pathology of early-phase 2019 Novel Coronavirus (COVID-19) Pneumonia in two patients with lung cancer                                                         | Yes | Case reports | 2  | AMB      | 1,1  | 78.5 (73-84)      |
| 47 | Dolhnikoff M     | Brazil      | Pathological evidence of pulmonary thrombotic phenomena in severe COVID-19                                                                                              | Yes | Case series  | 10 | PMB      | 5,5  | mean 67.8 (33-83) |
| 48 | Chen S           | China       | Pregnant women with new coronavirus infection: a clinical characteristic and placental pathological analysis of three cases                                             | Yes | Case series  | 3  | Placenta | 0,3  | 32 (23-34)        |
| 49 | Baud D           | Switzerland | Second-Trimester Miscarriage in a pregnant woman with SARS-CoV-2 Infection                                                                                              | Yes | Case report  | 1  | Placenta | 0,1  | 28                |
| 50 | Shanes ED        | USA         | Placental pathology in COVID-19                                                                                                                                         | Yes | Case series  | 15 | Placenta | 0,15 | 33 (23-41)        |
| 51 | Nagashima S      | Brazil      | The Endothelial Dysfunction and Pyroptosis Driving the SARS-CoV-2 Immune-Thrombosis                                                                                     | Yes | Case series  | 6  | PMB      | 4,2  | 80.5 (53-87)      |
| 52 | Li S             | China       | Clinical and pathological investigation of severe COVID-19 patients                                                                                                     | Yes | Case series  | 2  | PMB      | NA   | NA                |

|    |              |         |                                                                                                                                               |     |              |    |         |      |              |
|----|--------------|---------|-----------------------------------------------------------------------------------------------------------------------------------------------|-----|--------------|----|---------|------|--------------|
| 53 | Shao C       | China   | Evolution of severe acute respiratory syndrome coronavirus 2 RNA test results in a patient with fatal coronavirus disease 2019: a case report | Yes | Case report  | 1  | PMB     | 1,0  | 65           |
| 54 | Zhang H      | China   | Histopathologic changes and SARS-CoV-2 immunostaining in the lung of a patient with COVID-19                                                  | Yes | Case report  | 1  | PMB     | 1,0  | 72           |
| 55 | Wu J         | China   | Pathological changes of fatal coronavirus disease 2019 (COVID-19) in the lungs: report of 10 cases by postmortem needle autopsy               | Yes | Case series  | 10 | PMB     | 7,3  | 73.5 (39-87) |
| 56 | Xu X         | China   | Pathological changes of the spleen in ten patients with coronavirus disease 2019(COVID-19) by postmortem needle autopsy                       | Yes | Case series  | 10 | PMB     | 7,3  | 73.5 (39-87) |
| 57 | Xu Z         | China   | Pathological findings of COVID-19 associated with acute respiratory distress syndrome                                                         | Yes | Case report  | 1  | PMB     | 1,0  | 50           |
| 58 | Tian S       | China   | Pathological study of the 2019 novel coronavirus disease (COVID-19) through postmortem core biopsies                                          | Yes | Case series  | 4  | PMB     | 3,1  | 76 (59-81)   |
| 59 | Wang Y       | China   | SARS-CoV-2 infection of the liver directly contributes to hepatic impairment in patients with COVID-19                                        | Yes | Case reports | 2  | PMB     | 1,1  | 64.5 (50-79) |
| 60 | Copin MC     | Germany | Time to consider histologic pattern of lung injury to treat critically ill patients with COVID-19 infection                                   | Yes | Case series  | 6  | PMB     | NA   | NA           |
| 61 | Casagrande M | Germany | Detection of SARS-CoV-2 in Human Retinal Biopsies of Deceased COVID-19 Patients                                                               | Yes | Case series  | 14 | PMB     | 10,4 | mean 77      |
| 62 | Su H         | China   | Renal histopathological analysis of 26 postmortem findings of patients with COVID-19 in China                                                 | Yes | Case series  | 26 | Autopsy | 19,7 | 68 (39-87)   |
| 63 | Santana MF   | Brazil  | Confirmed invasive pulmonary aspergillosis and COVID-19: The value of postmortem findings to support antemortem management                    | Yes | Case report  | 1  | Autopsy | 1,0  | 71           |
| 64 | Kudose S     | USA     | Kidney Biopsy Findings in Patients with COVID-19                                                                                              | Yes | Case series  | 17 | AMB     | 12,5 | 54 (22-72)   |

|    |                  |             |                                                                                                                                                          |     |              |    |         |       |            |
|----|------------------|-------------|----------------------------------------------------------------------------------------------------------------------------------------------------------|-----|--------------|----|---------|-------|------------|
| 65 | Golmai P         | USA         | Histopathologic and Ultrastructural Findings in Postmortem Kidney Biopsy Material in 12 Patients with AKI and COVID-19                                   | Yes | Case series  | 12 | PMB     | 10,2  | 75 (49-92) |
| 66 | Flikweert AW     | Netherlands | Late histopathologic characteristics of critically ill COVID-19 patients: Different phenotypes without evidence of invasive aspergillosis, a case series | Yes | Case series  | 7  | PMB     | 5,2   | 74 (58-83) |
| 67 | Sharma P         | USA         | COVID-19-Associated Kidney Injury: A Case Series of Kidney Biopsy Findings                                                                               | Yes | Case series  | 10 | AMB     | 5,5   | 64 (45-77) |
| 68 | Youd E           | UK          | COVID-19 autopsy in people who died in community settings: the first series                                                                              | Yes | Case series  | 3  | Autopsy | 1,2   | 86 (73-88) |
| 69 | Magoon S         | USA         | COVID-19–Related Glomerulopathy: A Report of 2 Cases                                                                                                     | Yes | Case reports | 2  | AMB     | 1,1   | 42 (28-56) |
| 70 | Rapkiewicz AV    | USA         | Megakaryocytes and platelet-fibrin thrombi characterize multi-organ thrombosis at autopsy in COVID-19: A case series                                     | Yes | Case series  | 7  | Autopsy | 3,4   | 60 (44-65) |
| 71 | Beigmohammadi MT | Iran        | Pathological findings of postmortem biopsies from lung, heart, and liver of 7 deceased COVID-19 patients                                                 | Yes | Case series  | 7  | PMB     | 5,2   | 72 (46-84) |
| 72 | Wang C           | China       | Alveolar macrophage dysfunction and cytokine storm in the pathogenesis of two severe COVID-19 patients                                                   | Yes | Case reports | 2  | Autopsy | 1,1   | 58 (53-62) |
| 73 | Prieto-Pérez L   | Spain       | Histiocytic hyperplasia with hemophagocytosis and acute alveolar damage in COVID-19 infection                                                            | Yes | Case series  | 33 | PMB     | 21,12 | 79 (53-98) |
| 74 | Sauter JL        | USA         | Insights into pathogenesis of fatal COVID-19 pneumonia from histopathology with immunohistochemical and viral RNA studies                                | Yes | Case series  | 8  | Autopsy | 4,4   | 58 (39-65) |
| 75 | Kantonen J       | Finland     | Neuropathologic features of four autopsied COVID-19 patients                                                                                             | Yes | Case series  | 4  | Autopsy | 3,1   | 72 (38-90) |

AMB: Antemortem biopsy; PMB: Postmortem biopsy
